# Supplementary material for: Hollow TiO2@Co9S8 Core–Branch Arrays as Bifunctional Electrocatalysts for Efficient Oxygen/Hydrogen Production
Source: PubMed Central journal article supplement (PMC5867071; doi:10.1002/advs.201700772), 2017-12-19
Supplement: ADVS-5-1700772-s001.pdf [file ADVS-5-1700772-s001.pdf]

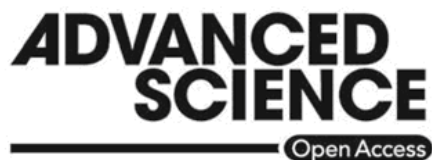

## Supporting Information

for *Adv. Sci.*, DOI: 10.1002/advs.201700772

Hollow  $\text{TiO}_2@ \text{Co}_9\text{S}_8$  Core–Branch Arrays as Bifunctional  
Electrocatalysts for Efficient Oxygen/Hydrogen Production

*Shengjue Deng, Yu Zhong, Yinxiang Zeng, Yadong Wang,  
Xiuli Wang, Xihong Lu,\* Xinhui Xia,\* and Jiangping Tu*

Copyright WILEY-VCH Verlag GmbH & Co. KGaA, 69469 Weinheim, Germany, 2017.

## Supporting Information

### Hollow $\text{TiO}_2@ \text{Co}_9\text{S}_8$ Core-Branch Arrays as Bifunctional Electrocatalysts for Efficient Oxygen/Hydrogen Production

Shengjue Deng<sup>1</sup>, Yu Zhong<sup>1</sup>, Yinxiang Zeng<sup>2</sup>, Yadong Wang<sup>3</sup>, Xiuli Wang<sup>1</sup>, Xihong Lu<sup>2\*</sup>,  
Xinhui Xia<sup>1\*</sup>, Jiangping Tu<sup>1</sup>

<sup>1</sup> State Key Laboratory of Silicon Materials, Key Laboratory of Advanced Materials and Applications for Batteries of Zhejiang Province, and Department of Materials Science and Engineering, Zhejiang University, Hangzhou 310027, P. R. China.

<sup>2</sup> MOE of the Key Laboratory of Bioinorganic and Synthetic Chemistry, KLGHEI of Environment and Energy Chemistry, School of Chemistry, Sun Yat-Sen University, Guangzhou 510275, China.

<sup>3</sup> School of Engineering, Nanyang Polytechnic, 569830, Singapore

Correspondence and requests for materials should be addressed to X. Xia (email: [helloxxh@zju.edu.cn](mailto:helloxxh@zju.edu.cn)) and X. Lu (email: [luxh6@mail.sysu.edu.cn](mailto:luxh6@mail.sysu.edu.cn))

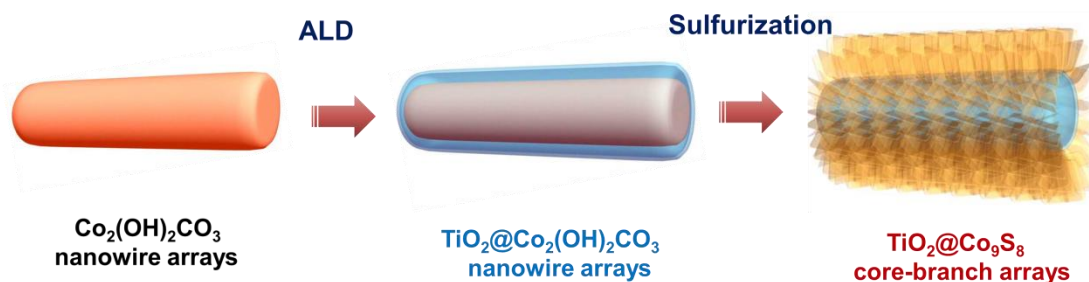

**Figure S1.** Growth schematics of  $\text{TiO}_2@ \text{Co}_9\text{S}_8$  hollow core-branch arrays.

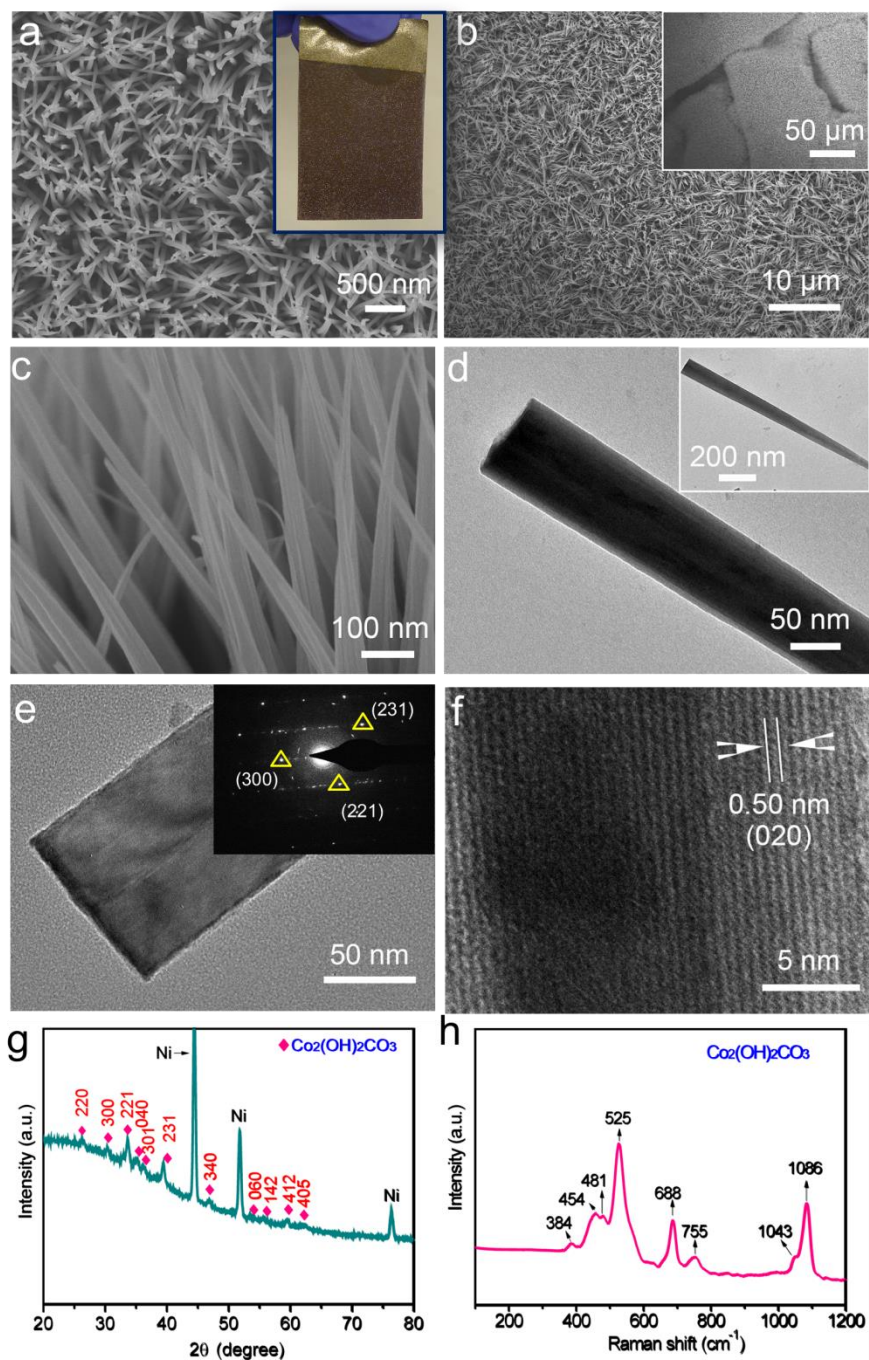

**Figure S2.** Morphology and microstructure characterizations of  $\text{Co}_2(\text{OH})_2\text{CO}_3$  nanowires arrays: (a-c) SEM images (photo of sample in inset); (d-f) TEM-HRTEM images (SAED pattern in inset); (g) XRD pattern; (h) Raman spectrum.

Except for the peaks of nickel foam substrate, the left diffraction peaks are indexed well with the crystal planes of  $\text{Co}_2(\text{OH})_2\text{CO}_3$  (JCPDS 48-0083) (**Figure S2g**), indicating the formation of high crystallinity of  $\text{Co}_2(\text{OH})_2\text{CO}_3$ . Its Raman spectrum (**Figure S2h**) shows eight typical peaks of  $\text{Co}_2(\text{OH})_2\text{CO}_3$  in the region of 200-1100  $\text{cm}^{-1}$ .

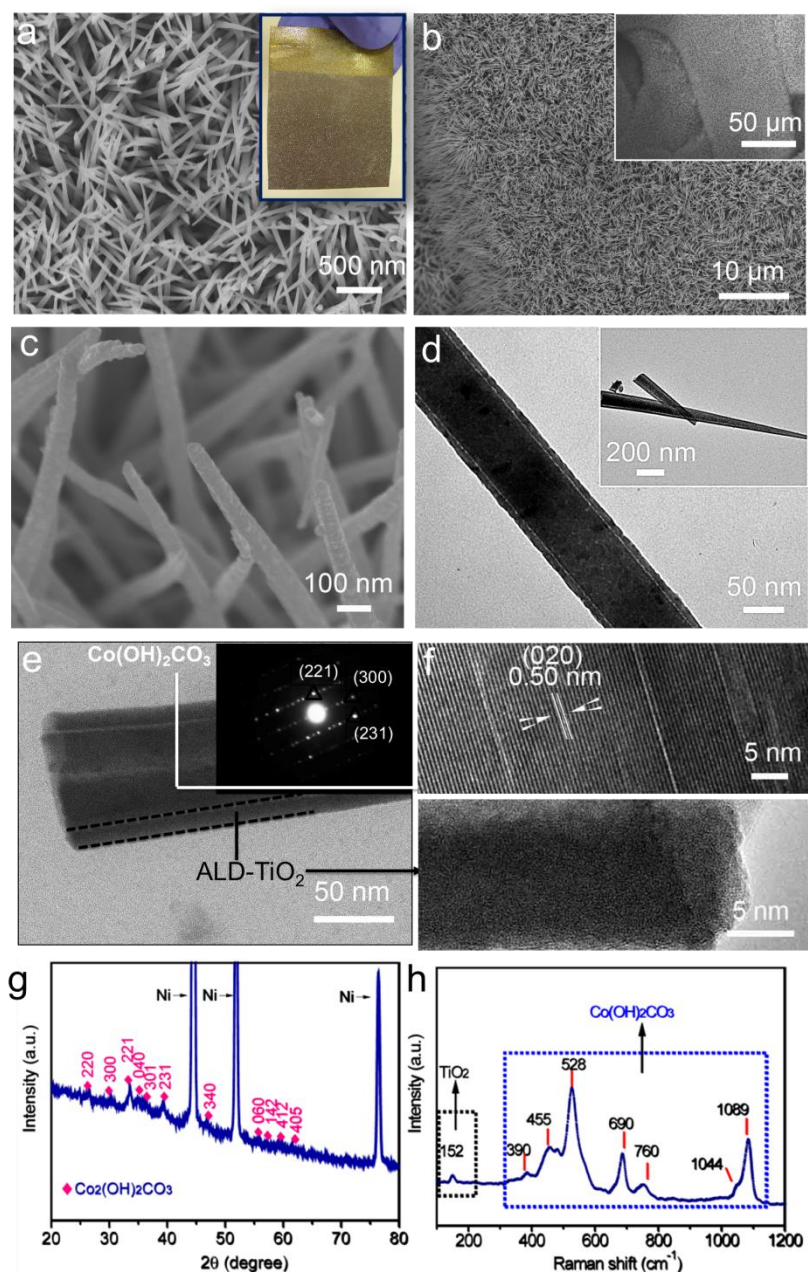

**Figure S3.** Morphology and microstructure characterizations of  $\text{TiO}_2@\text{Co}(\text{OH})_2\text{CO}_3$  core-shell arrays: (a-c) SEM images (photo of sample in inset); (d-f) TEM-HRTEM images (SAED pattern in inset); (g) XRD pattern; (h) Raman spectrum.

Only diffraction peaks of  $\text{Co}(\text{OH})_2\text{CO}_3$  (JCPDS 48-0083) are noticed and no peaks of  $\text{TiO}_2$  are detected in the XRD pattern (**Figure S3g**), indicating the amorphous nature of ALD- $\text{TiO}_2$ . Additionally, the co-existence of  $\text{Co}(\text{OH})_2\text{CO}_3$  and  $\text{TiO}_2$  is verified in the Raman spectrum (**Figure S3h**). In addition to the Raman peaks of  $\text{Co}_2(\text{OH})_2\text{CO}_3$  (Figure S2h), a new characteristic peak of  $\text{TiO}_2$  at  $150\text{ cm}^{-1}$  is noted.



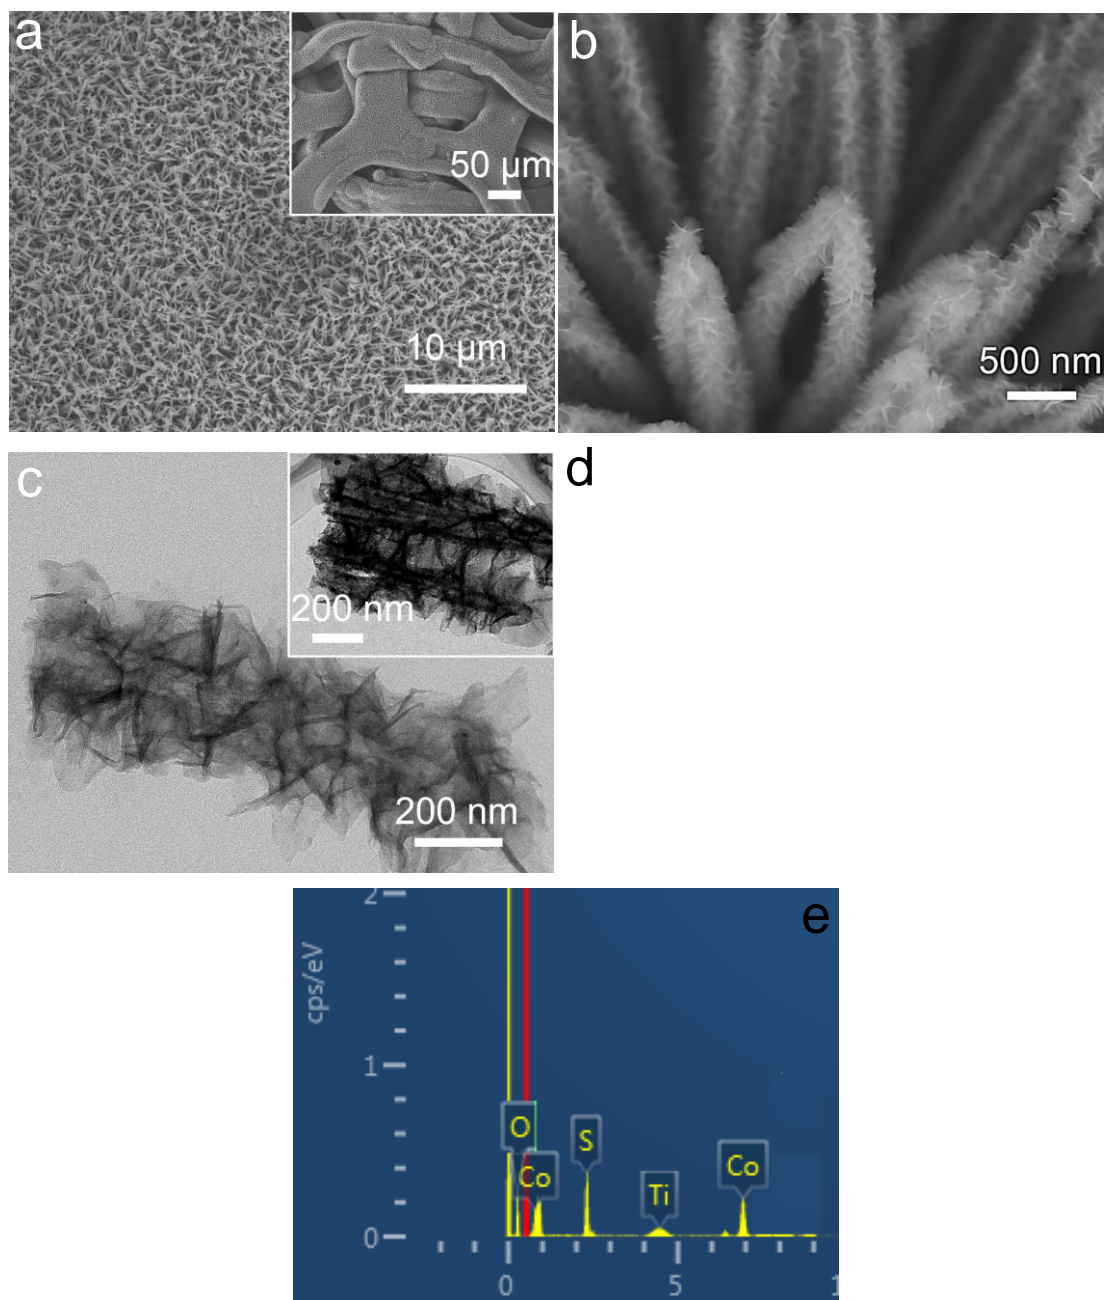

**Figure S4.** SEM-TEM images of  $\text{TiO}_2@Co_9S_8$  hollow core-branch arrays on the nickel foam substrate: (a, b) SEM images; (c) TEM image (low-magnification TEM image in inset); and (d) XRD pattern; (e) EDS spectrum of  $\text{TiO}_2@Co_9S_8$  hollow core-branch arrays in Figure S4c.

The diffraction peaks (311), (22 2), (331) and (531) in XRD pattern are indexed well with the crystal planes of  $Co_9S_8$  phase (JCPDS 65-6801), indicating the successful synthesis of

TiO<sub>2</sub>@Co<sub>9</sub>S<sub>8</sub> arrays on the nickel foam (**Figure S4d**). Also, the above results are supported by the EDS spectrum.

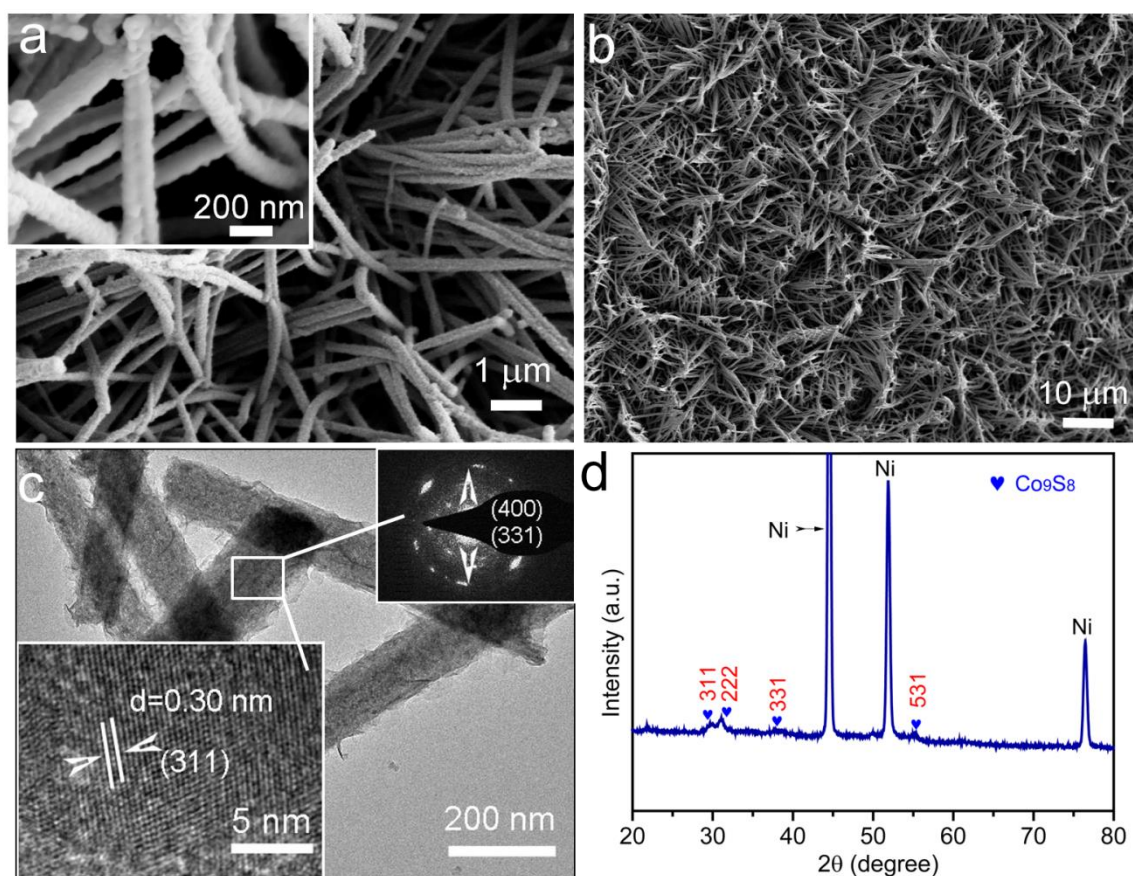

**Figure S5.** SEM-TEM images of Co<sub>9</sub>S<sub>8</sub> nanowires arrays: (a-b) SEM images (inset: high-magnification SEM image); (c) TEM-HRTEM images (SAED pattern and HRTEM image in inset); (d) XRD pattern.

SEM images (**Figure S5a-b**) indicate the uniform distribution of Co<sub>9</sub>S<sub>8</sub> nanowires on the nickel foam. TEM-HRTEM and SAED images (**Figure S5c**) reveal the formation of regular Co<sub>9</sub>S<sub>8</sub> nanowires. The bright diffraction rings of (400) and (331) demonstrate the existence of high-crystalline Co<sub>9</sub>S<sub>8</sub> phase (JCPDS 65-6801). And HRTEM image (inset in **Figure S5c**) exhibits the layer spacing of about 0.30 nm, which matches well with the (311) planes of Co<sub>9</sub>S<sub>8</sub> phase, supported by the XRD pattern (JCPDS 65-6801).

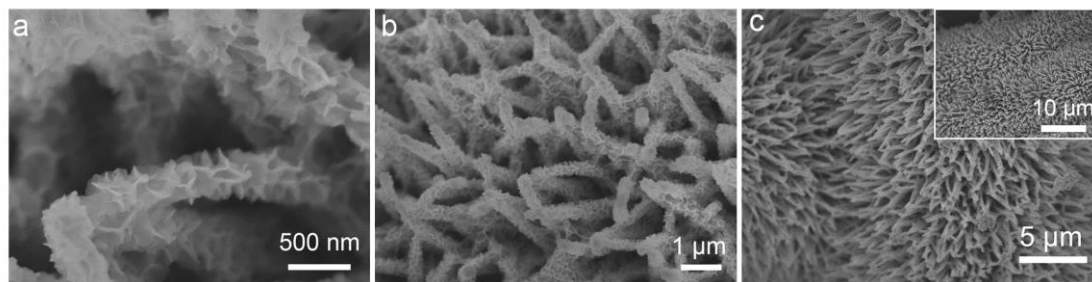

**Figure S6.** SEM images of  $\text{TiO}_2@\text{Co}_9\text{S}_8$  hollow core-branch arrays grown on the carbon cloth substrate.

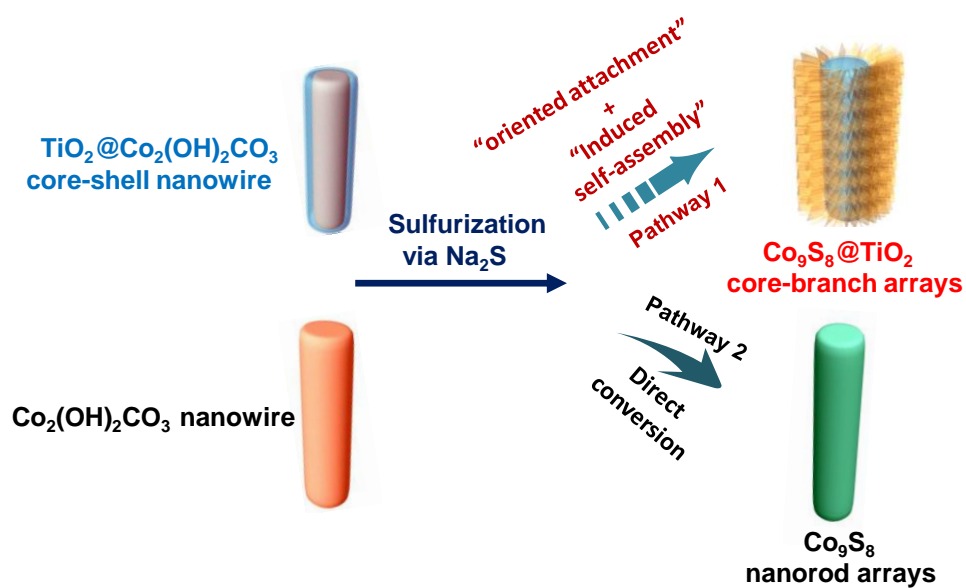

**Figure S7.** Schematic illustration of the synthesis of  $\text{Co}_9\text{S}_8@\text{TiO}_2$  branch-core and  $\text{Co}_9\text{S}_8$  nanowires arrays.

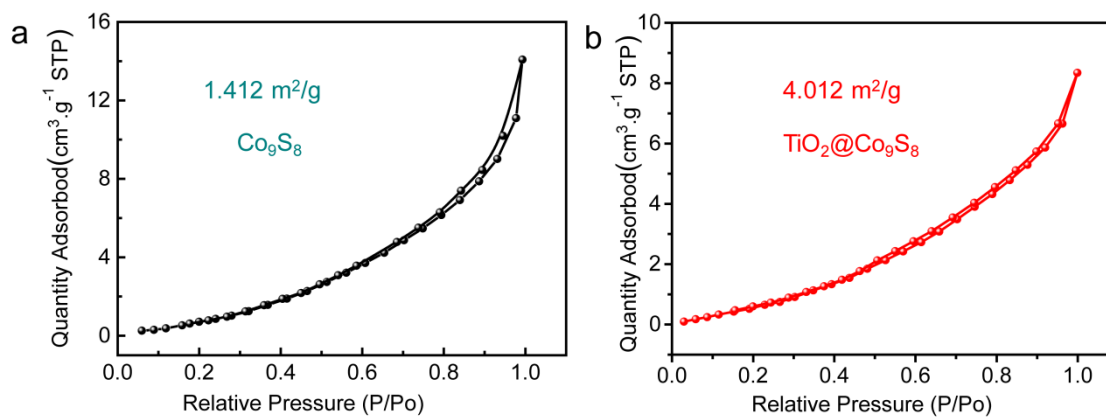

**Figure S8.** BET measurements: nitrogen adsorption-desorption isotherm curves: (a)  $\text{Co}_9\text{S}_8$  nanowire arrays and (b)  $\text{TiO}_2@ \text{Co}_9\text{S}_8$  hollow core-branch arrays.

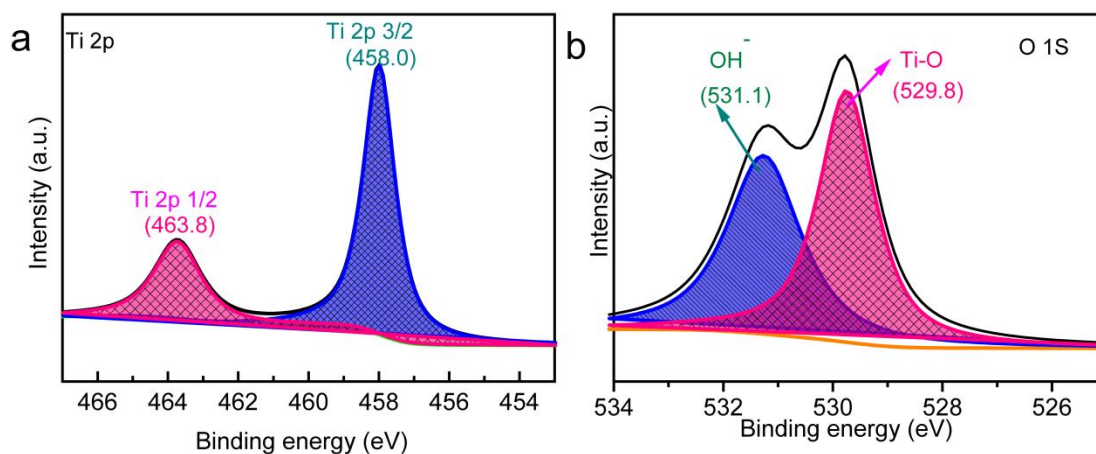

**Figure S9.** XPS spectra of O 1S and Ti 2p of  $\text{TiO}_2@ \text{Co}_9\text{S}_8$  arrays.

Two core levels Ti 2p1/2 ( $463.8 \text{ eV}$ ) and Ti 2p3/2 ( $458.0 \text{ eV}$ ) characteristic of  $\text{TiO}_2$  are detected (**Figure S9a**).<sup>[1]</sup> Accordingly, Ti-O bond ( $529.8 \text{ eV}$ ) is noticed, while the peak at  $531.1 \text{ eV}$  belongs to  $\text{OH}^-$  (**Figure S9b**).<sup>[2]</sup>



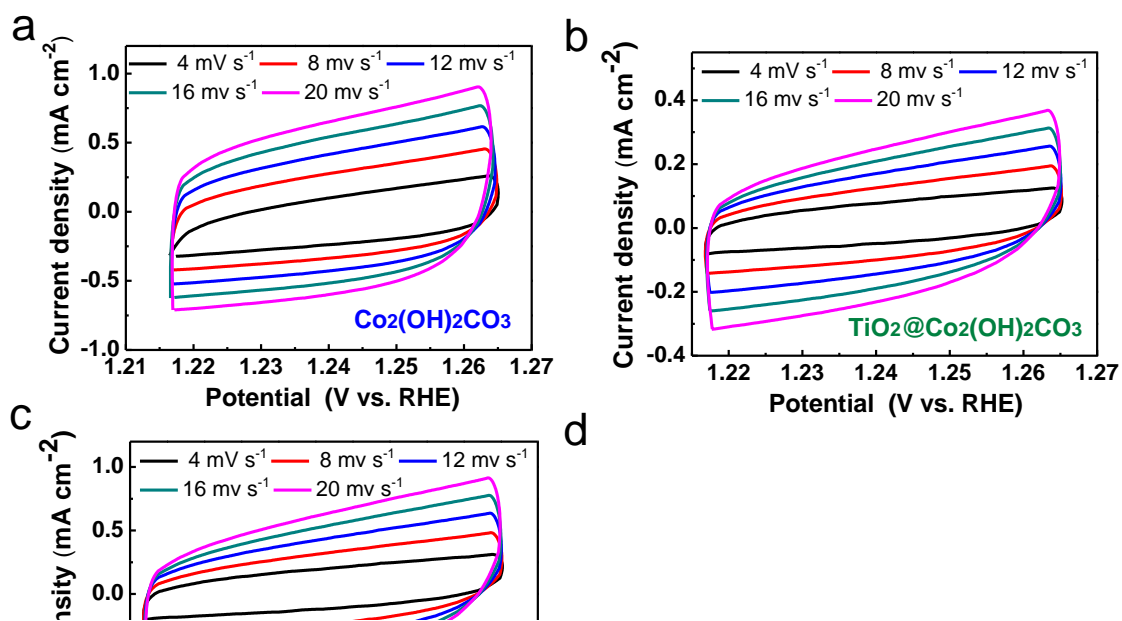

**Figure S10.** CV curves of different electrodes in double layer region at scan rates of 4, 8, 12, 16 and 20  $\text{mV s}^{-1}$ , respectively.: (a)  $\text{Co}_2(\text{OH})_2\text{CO}_3$ ; (b)  $\text{TiO}_2@\text{Co}(\text{OH})_2\text{CO}_3$ ; (c)  $\text{Co}_9\text{S}_8$ ; (d)  $\text{TiO}_2@\text{Co}_9\text{S}_8$  electrodes.

**Table S1** Electrocatalytic comparison for different catalysts

| Catalyst | OER<br>Overpotential<br>(mV vs.<br>RHE) | Tafel<br>slope<br>(mV<br>$\text{Dec}^{-1}$ ) | HER<br>Overpotential<br>(mV vs.<br>RHE) | Tafel<br>slope<br>(mV<br>$\text{Dec}^{-1}$ ) | Ref. |
|----------|-----------------------------------------|----------------------------------------------|-----------------------------------------|----------------------------------------------|------|
|----------|-----------------------------------------|----------------------------------------------|-----------------------------------------|----------------------------------------------|------|

|                                                   |     |     |     |     |           |
|---------------------------------------------------|-----|-----|-----|-----|-----------|
| $\text{Co}_2(\text{OH})_2\text{CO}_3$             | 330 | 79  | 197 | 102 | This work |
| $\text{TiO}_2@\text{Co}_2(\text{OH})_2\text{O}_3$ | 350 | 89  | 226 | 126 | This work |
| $\text{Co}_9\text{S}_8$                           | 276 | 73  | 222 | 85  | This work |
| $\text{TiO}_2@\text{Co}_9\text{S}_8$              | 240 | 55  | 139 | 65  | This work |
| $\text{S-CuCo}_2\text{O}_4$                       | /   | /   | 154 | 180 | [3]       |
| $\text{Co}_9\text{S}_8@\text{C}$                  | /   | /   | 280 | /   | [4]       |
| cobalt-sulfide                                    | /   | /   | 160 | 93  | [5]       |
| $\text{Co}_2\text{P}$ nanorods                    | /   | /   | 155 | 71  | [6]       |
| $\text{NiMo}@\text{N-C}$                          | /   | /   | 130 | 84  | [7]       |
| $\text{NiFe}@\text{N-C}$                          | 297 | 48  | /   | /   | [7]       |
| $\text{Co-P}$                                     | 345 | 42  | 94  | 47  | [8]       |
| $\text{Co}_9\text{S}_8/\text{graphene}$           | 409 | 82  | /   | /   | [9]       |
| $\text{Co}_9\text{S}_8@\text{N, S-C}$             | 310 | 68  | /   | /   | [10]      |
| $\text{Ni}_3\text{S}_2$ nanorods                  | 157 | 159 | /   | /   | [11]      |
| $\text{NiS}$                                      | 290 | 89  | 140 | 83  | [12]      |
| $\text{NiFeS-Fe/NF}$                              | 101 | 117 | /   | /   | [13]      |
| $\text{Ni}_2\text{P}$                             | 290 | /   | /   | /   | [14]      |

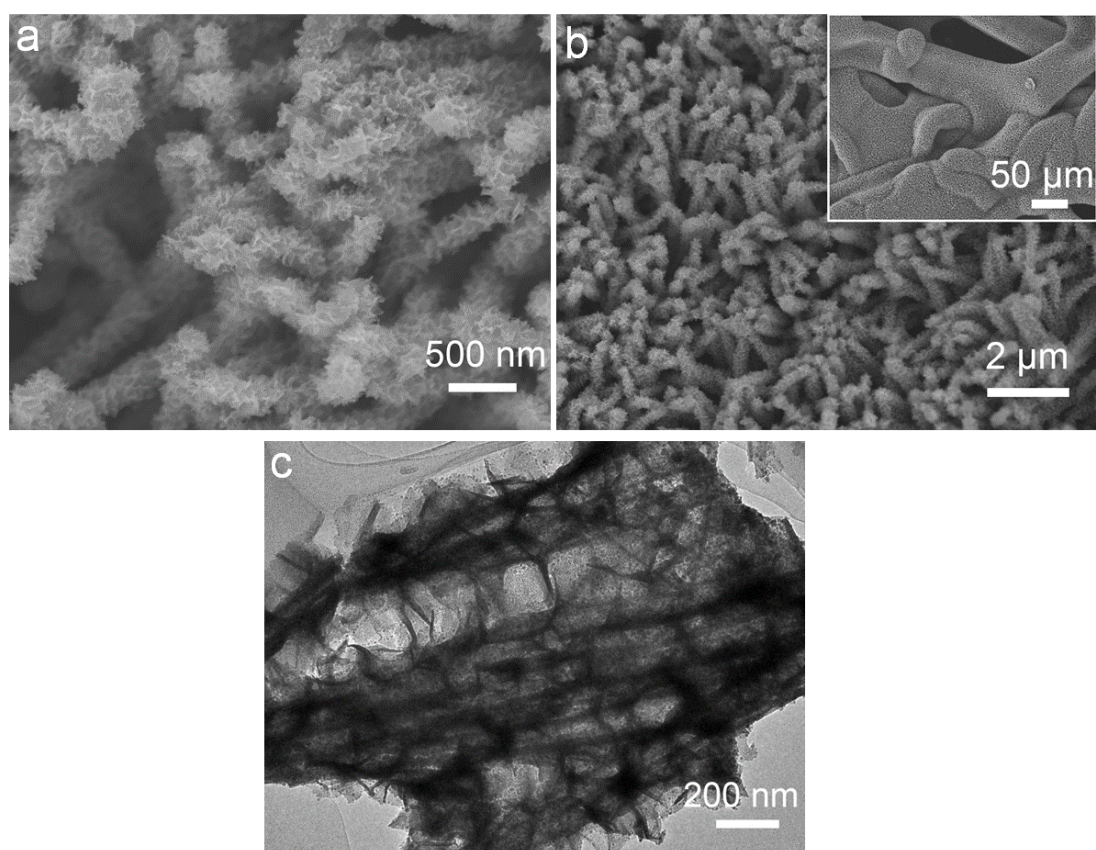

**Figure S11.** SEM images of  $\text{TiO}_2@\text{Co}_9\text{S}_8$  electrode after 30 h test at  $10 \text{ mA cm}^{-2}$  during overall water splitting.

## References

- [1] X. Xia, Z. Zeng, X. Li, Y. Zhang, J. Tu, N. C. Fan, H. Zhang, H. J. Fan, *Nanoscale* **2013**, 5, 6040.
- [2] Y. Cong, J. Zhang, F. Chen, M. Anpo, *J. Phys. Chem. C* **2007**, 111, 6976.
- [3] Y. Gong, Y. Zhao, Y. Chen, Y. Wang, C. Sun, *RSC Adv.* **2016**, 6, 43185.
- [4] L.-L. Feng, G.-D. Li, Y. Liu, Y. Wu, H. Chen, Y. Wang, Y.-C. Zou, D. Wang, X. Zou, *ACS Appl. Mater. Interfaces* **2015**, 7, 980.
- [5] Y. Sun, C. Liu, D. C. Grauer, J. Yano, J. R. Long, P. Yang, C. J. Chang, *J. Am. Chem. Soc.* **2013**, 135, 17699.
- [6] Z. Huang, Z. Chen, Z. Chen, C. Lv, M. G. Humphrey, C. Zhang, *Nano Energy* **2014**, 9, 373.
- [7] Y. Zhang, X. Xia, X. Cao, B. Zhang, N. H. Tiep, H. He, S. Chen, Y. Huang, H. J. Fan, *Adv. Energy Mater.* **2017**.
- [8] N. Jiang, B. You, M. Sheng, Y. Sun, *Angewandte Chemie* **2015**, 127, 6349.
- [9] S. Dou, L. Tao, J. Huo, S. Wang, L. Dai, *Energy Environ. Sci.* **2016**, 9, 1320.
- [10] H.-x. Zhong, K. Li, Q. Zhang, J. Wang, F.-l. Meng, Z.-j. Wu, J.-m. Yan, X.-b. Zhang, *NPG Asia Mater.* **2016**, 8, e308.
- [11] W. Zhou, X.-J. Wu, X. Cao, X. Huang, C. Tan, J. Tian, H. Liu, J. Wang, H. Zhang, *Energy Environ. Sci.* **2013**, 6, 2921.
- [12] W. Zhu, X. Yue, W. Zhang, S. Yu, Y. Zhang, J. Wang, J. Wang, *Chem. Commun.* **2016**, 52, 1486.
- [13] B. Dong, X. Zhao, G.-Q. Han, X. Li, X. Shang, Y.-R. Liu, W.-H. Hu, Y.-M. Chai, H. Zhao, C.-G. Liu, *J. Mater. Chem. A* **2016**, 4, 13499.
- [14] L.-A. Stern, L. Feng, F. Song, X. Hu, *Energy Environ. Sci.* **2015**, 8, 2347.
